# Supplementary material
Source: PubMed Central journal article supplement (PMC1224617)

Angptl1

Angptl2

Fao

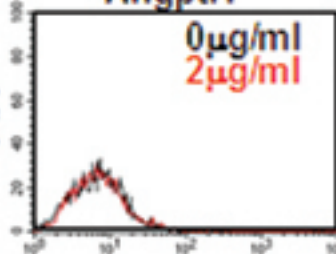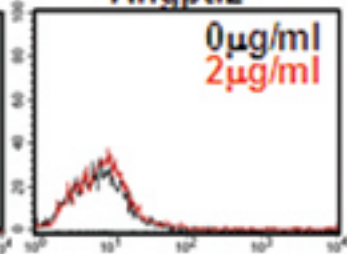

BaF/3

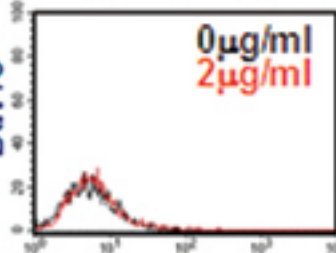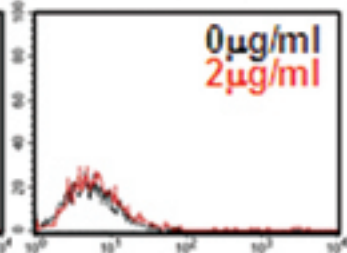

FITC (FLAG)

Supplement: pnas_0501902102_1.pdf [file pnas_0501902102_1.pdf]

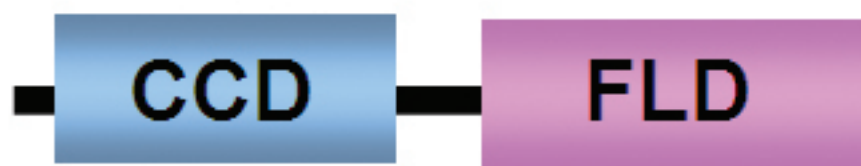

hAngptl1  
vs  
hAngptl2

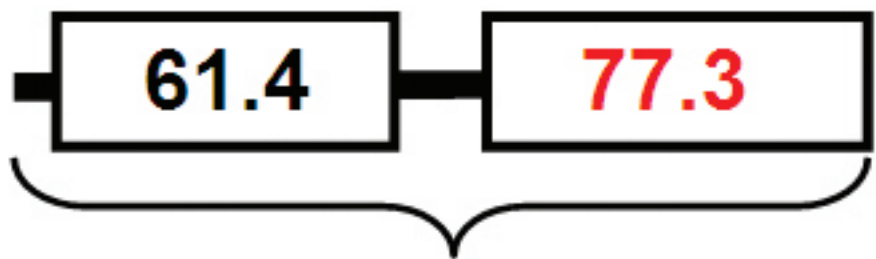

61.7

mAngptl1  
vs  
mAngptl2

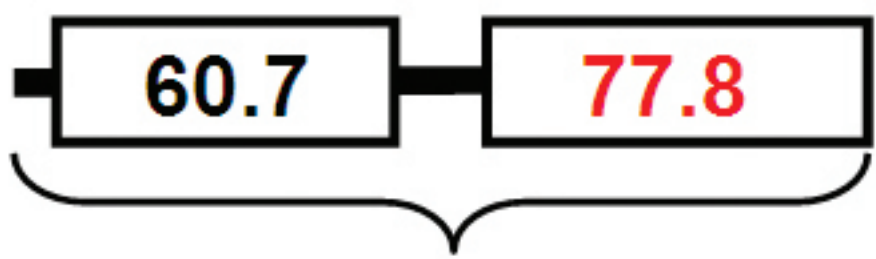

58.4

Zangptl1  
vs  
Zangptl2

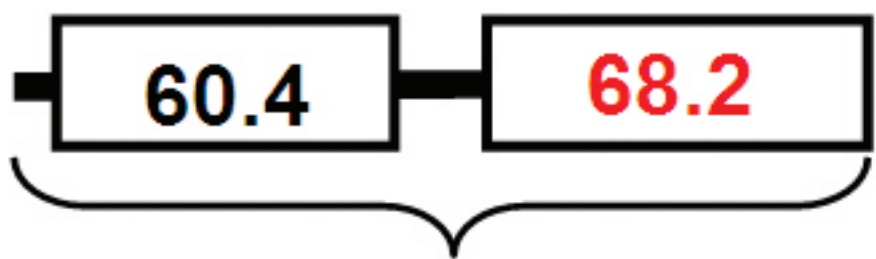

56.2

Supplement: pnas_0501902102_2.pdf [file pnas_0501902102_2.pdf]

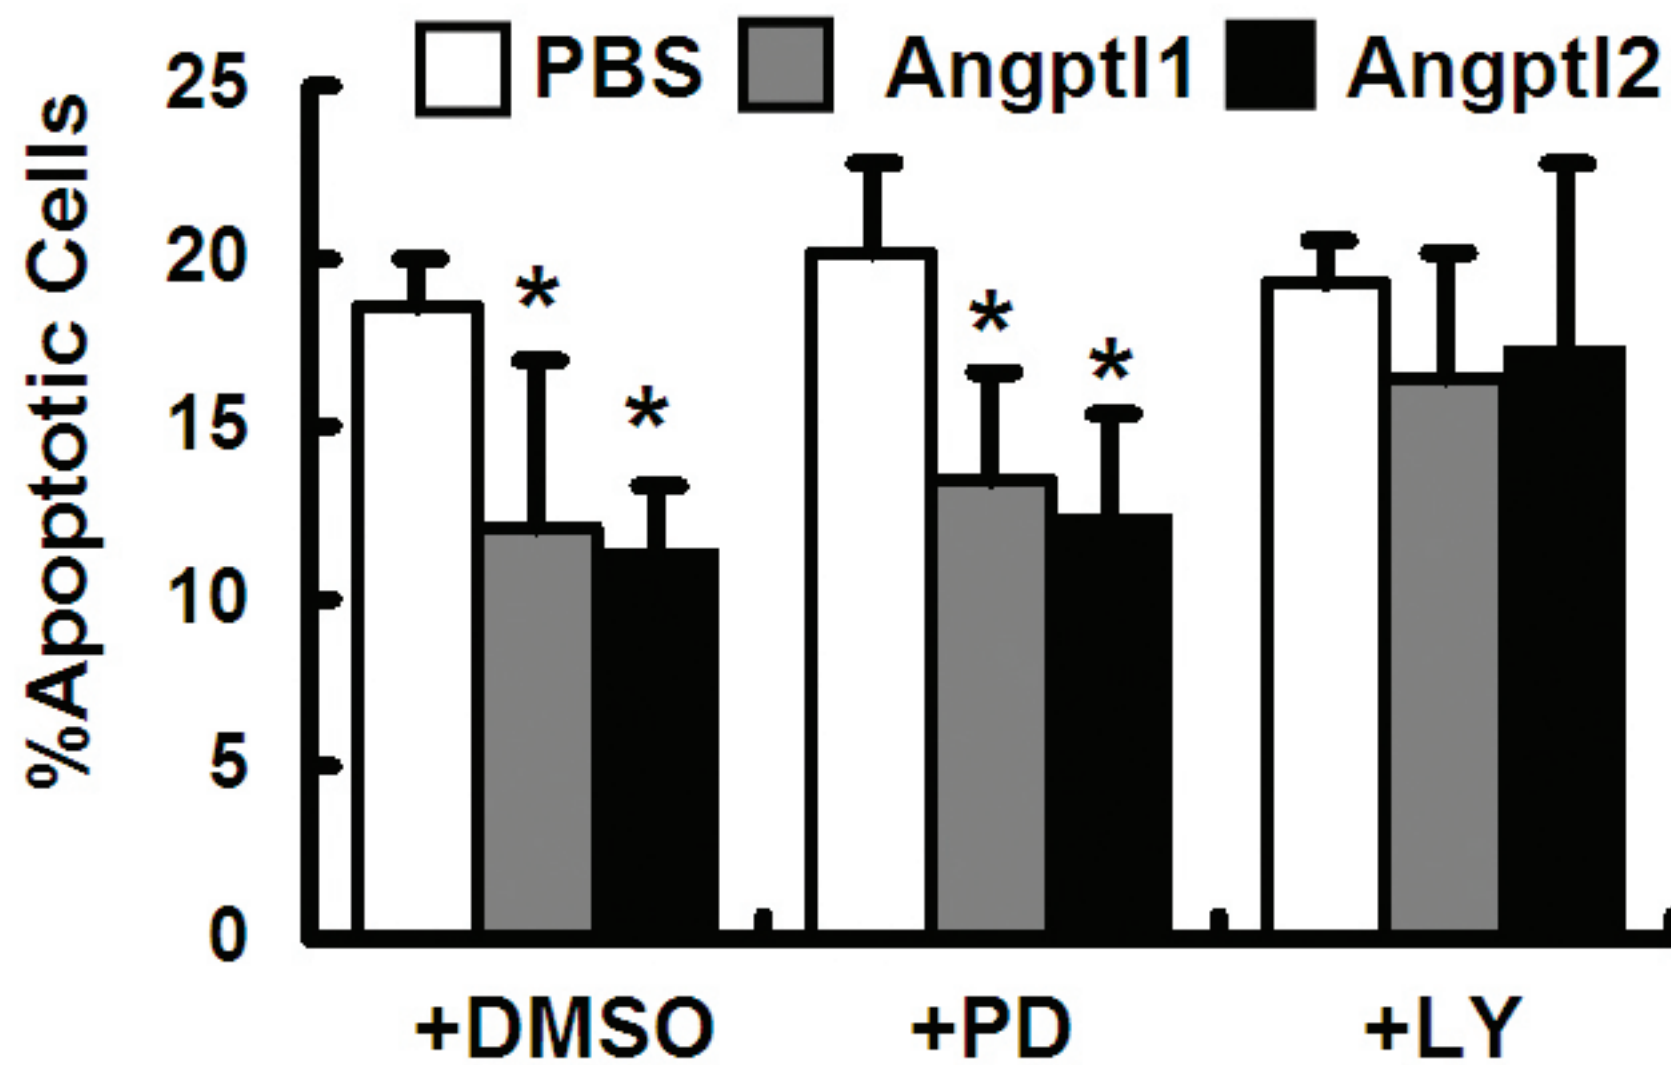

Supplement: pnas_0501902102_3.pdf [file pnas_0501902102_3.pdf]
